# Supplementary material for: Transfer of Anti-klebsiella Pneumoniae Immunity Following Infection in Mice is Protective Against Lethal Challenge in Offspring
Source: Research Square preprint supplement (doi:10.21203/rs.3.rs-7152442/v1), 2025-07-23
Supplement: Supplementary file 1 [file 37c9d08e9962a2229d05298e.xlsx]

## Sheet: Sheet1
UBC Facilities Grading System and Response Guide for Rodents: Modified
	Grade 1	Grade 2	Grade 3	Grade 4	Grade 5
Behaviour: Activity/Gait	Intermittent stereotypic behaviour (e.g. only when cage changing)	Slightly slow moving; still interested in environment.	Less interested in the environment, interacts less with cage mates, disregards observer; when nudged, reluctantly moves away. Occasional abnormal gait e.g. limping or “tip-toed” gait.	Isolated from cage mates, minimally active; does not readily move when cage disturbed. When nudged, reluctantly moves. Frequent limping or “tip-toed” gait.	Immobile or hyperactive; not moving when nudged; animal cannot right itself. Stereotypic behavior that cannot be stopped, impacting health and welfare (e.g. poor body condition, lesions).
Appearance: Grooming/Fur Posture	Barbering but skin healthy.	Piloerection/ruffled (< 10% of body). Runted weanling.	Piloerection (25% of body e.g. base of neck) and dull fur (not shiny or smooth).	Piloerection (50% of body), matted and un- groomed.	Piloerection (>75% of body), matted and un- groomed with other severe signs of illness. Barbering with > 50% loss of fur and signs of inflammation.
			Slight hunching in back.	Whiskers barbered.	Hydrocephalus.
				Severe hunching in back, even when walking.
Dehydration	N/A	Mildly sunken eyes (appear >75% open).	Skin tent > 2 seconds (decrease in skin elasticity) represents 10-15% dehydration. Sunken eyes (appear half closed).	Skin tent > 5 seconds represents 15- 20% dehydration. Completely closed or severely sunken eyes; tail feels square. Cool to touch.	Animal unresponsive and cold to touch. Severe skin tent (> 10 seconds).
Respiration: Rate Rhythm Effort	Occasional bout of increased rate after activity. Regular rhythm and effort.	Subtle change in rate or effort with activity but normal at rest. Regular rhythm.	Obvious change in rate or effort with activity and at rest (see chest expansion).	Reduced rate (easy to count) at rest and when active. Irregular rhythm. Appears to require effort (head bobs or body moves with breathing). Noisy breathing; Nasal discharge affecting breathing.	Reduced rate (≅Mice <95; Rats <75 bpm). Irregular rhythm.
			Occasional irregular rhythm.		Gasping, struggling to breath, open mouth breathing. Skin cyanotic (blue).
			Small amount of nasal discharge or sneezing.
Abdomen	N/A	Mild abdominal distention.	Moderate abdominal distention. Abnormal increase in BW.	Enlarged and tense abdomen or palpable mass. Body weight increases	Ascites/abdominal distension where burden exceeds 10% of BW (looks full term pregnant) with other clinical signs. Abnormal body weight increase. Abdominal hernia.
Elimination: Feces Urine	Intermittent (every other day) soft feces but formed. Hydration normal.	Daily paste-like feces. Hydration normal.	Daily watery diarrhea with occasional formed soft feces or increased output of urine. Small area of fecal staining around anus or mild urine scalding (wet, reddish skin). Hydration normal.	Watery diarrhea or increased urine output resulting in dehydration. Large area of fecal staining on fur or urine scalding (wet, reddish skin) or visible fecal smearing on cage wall.	Only watery or bloody diarrhea and increased urine output; unable to maintain hydration.
Body Weight	↓weight by 1-4%	↓weight by 5-9%	↓weight by 10-14%	↓weight by 15-19%	↓weight by ≥ 20%
Injection Site Reaction	N/A	Mild redness at site; small lump (<3 mm) at site	Moderate redness at site; moderate lump (3-5 mm) at site	Marked redness at vaccination site; large lump (5 mm to 1.5 cm); small ulcer (<5 mm) that is otherwise clean and dry	Lump > 1.5 cm, ulceration > 5mm; necrosis or infection at site (red, raw, moist, pus, or bleeding); self-mutilation at site exposing underlying tissues
Pain		Facial Grimace: Narrow or closed eyes, bulge on top of nose (mice), flattening of bridge of nose (rat), cheek (between eye and whiskers) bulge (mice), cheek sunken (rat), ears back or flat, whiskers pointing back or “standing out on end”.			Persistent signs of pain that interfere with normal functions or cannot be alleviated.
		Other: Muscle twitching or flinching, staggering, back stretch (like cat), abdominal writhing or pressing.
